# Supplementary material for: Trichostatin A Alleviates Renal Interstitial Fibrosis Through Modulation of the M2 Macrophage Subpopulation
Source: MDPI journal article supplement (doi:10.3390/ijms21175966), 2020-08-19
Supplement: s1 [file s1]

## **Supplemental Information**

### **Trichostatin A alleviates renal interstitial fibrosis through modulation of M2 macrophage subpopulation**

#### **Supplemental materials and methods**

##### **Cell culture and treatment**

Normal rat renal tubular NRK-49F cells (Bioresource Collection and Research Center) were cultured in the low-glucose Dulbecco's Modified Eagle Medium (10-014-CV, Corning Inc.) supplemented with 5% fetal bovine serum (Gibco). To determine the effect of trichostatin A on the activation of renal fibroblasts, NRK-49F cells were stimulated with transforming growth factor- $\beta$ 1 (5 ng/mL, PeproTech) for 1 and 2 days in the presence or absence of trichostatin A (500 nM, Sigma-Aldrich).

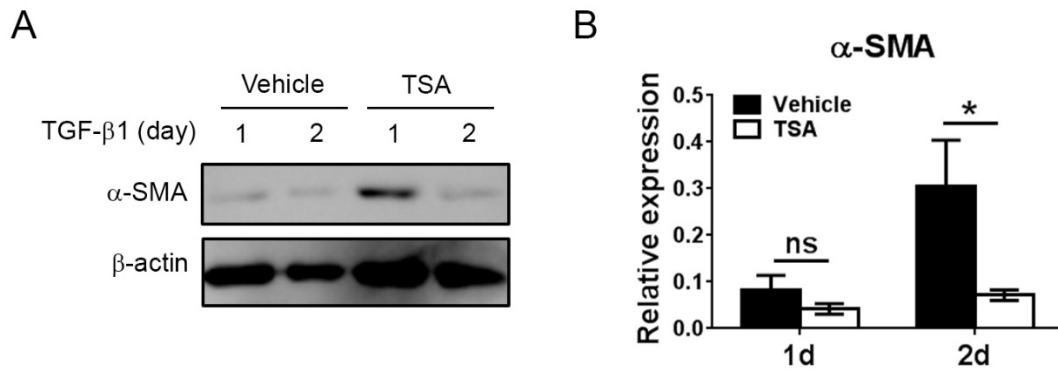

**Supplemental Figure 1.** The effect of trichostatin A (TSA) on the activation of renal fibroblasts. (A) Western blots of  $\alpha$ -smooth muscle actin ( $\alpha$ -SMA) expression in transforming growth factor- $\beta$ 1 (TGF- $\beta$ 1, 5 ng/mL)-stimulated renal NRK-49F fibroblasts at the indicated time.  $\beta$ -actin served as the loading control. (B) Quantification of the  $\alpha$ -SMA expression, \*  $p$  < 0.05 by the unpaired Student's  $t$  test. ns, non-significance.  $n$  = 3 for each group.
